# Supplementary material
Source: publisher figshare collection journal article supplement (https://tandf.figshare.com/ndownloader/files/20773530)
Supplement: Supplementary file 1 [file 20773530]

## SUPPLEMENTARY MATERIALS

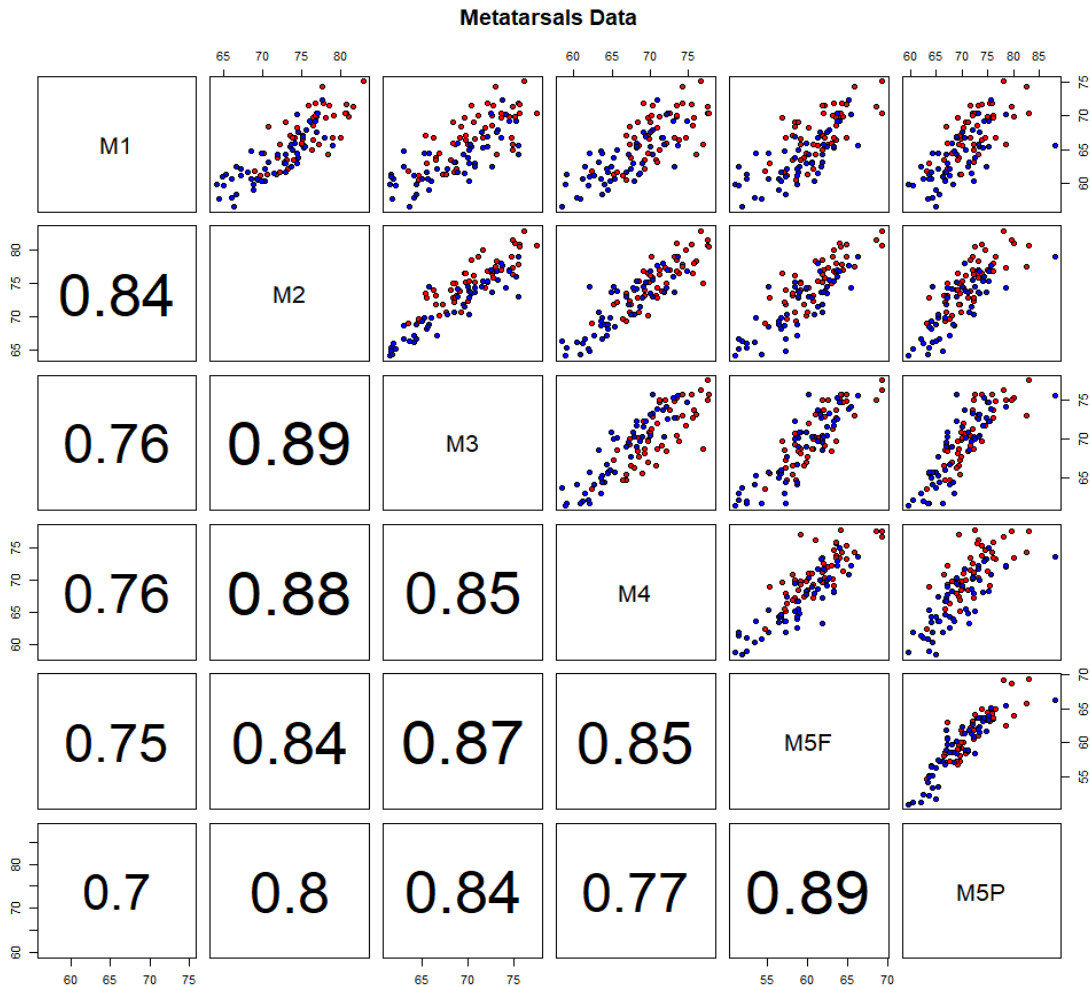

**Figure S1.** Relationship among metatarsal measurements showing a distinct separation between sexes. The blue and red dots represent males and females measurements, respectively.

Abbreviations:

M1= Length of first metatarsal; M2= Length of second metatarsal; M3= Length of third metatarsal; M4= Length of fourth metatarsal; M5F= Functional length of fifth metatarsal; M5P= Morphological length of fifth metatarsal

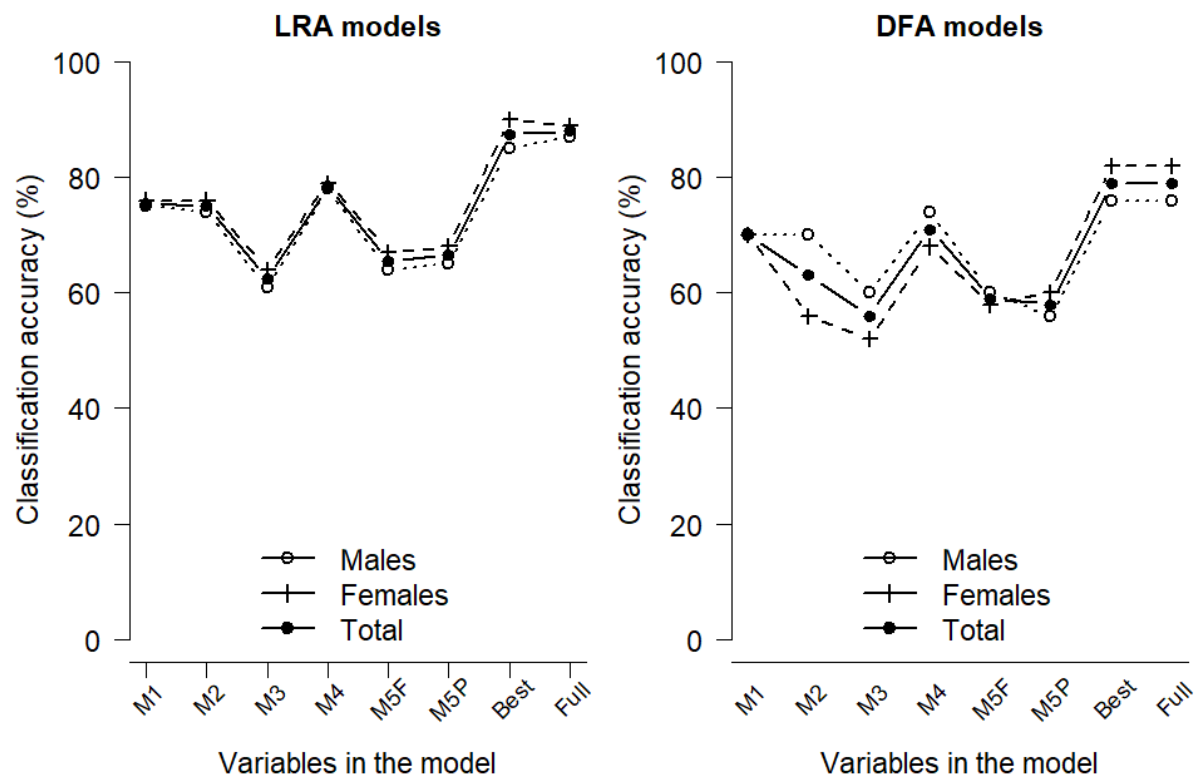

**Figure S2.** Classification accuracy for males, females and pooled sex using LRA and DFA with each metatarsal measurement, including the best and full models.
